# Supplementary material for: [Evaluation of cancelled emergency physician missions and patient handovers in the area of Innsbruck : Retrospective assessment of physician-staffed emergency medical service cancellations and handovers from the emergency physician to the emergency medical service in 2017 and 2018].
Source: Springer Nature journal article supplement (doi:10.1007/s00101-021-01046-y), 2022-04-01
Supplement: MOESM1 [file 19754760]

**Zusatzmaterial zum Beitrag** „Evaluierung der NEF-Fehl- und Übergabeeinsätze im Raum Innsbruck“ von Troppmair T., Egger J., Krösbacher A. et al. (2021) in *Der Anaesthesist*.

Beitrag und Zusatzmaterial stehen Ihnen auf [www.springermedizin.de](http://www.springermedizin.de) zur Verfügung. Bitte geben Sie dort den Beitragstitel in die Suche ein.

## Auflistung der Notarztindikationen

| Notarztindikation gegeben                                                                                                                                                                                                                                                                                                                                                                                                                                                                                                          | Stornierung / Übergabe gerechtfertigt                                                                                                                                                                                                                                                                           |
|------------------------------------------------------------------------------------------------------------------------------------------------------------------------------------------------------------------------------------------------------------------------------------------------------------------------------------------------------------------------------------------------------------------------------------------------------------------------------------------------------------------------------------|-----------------------------------------------------------------------------------------------------------------------------------------------------------------------------------------------------------------------------------------------------------------------------------------------------------------|
| <b>Kardial kritisch</b> <ul style="list-style-type: none"><li>• Herzinfarkt (STEMI und NSTEMI)</li><li>• Hypertensive Krise (&gt; 180 mmHg systolisch mit Symptomen)</li><li>• Tachykardie &gt; 180/min</li><li>• Schock durch implantierten Defibrillator</li><li>• Instabile kardiale Dekompensation</li><li>• Kardiogener Schock</li><li>• Schrittmacherprobleme – kardial instabil</li><li>• Herzrhythmusstörungen – instabil</li><li>• Aortendissektion</li><li>• Lungenembolie</li><li>• Instabile Angina pectoris</li></ul> | <b>Kardial stabil</b> <ul style="list-style-type: none"><li>• Endokarditis / Myokarditis – vital stabil</li><li>• Chronische Herzinsuffizienz</li><li>• Kardiale Dekompensation – vital stabil</li><li>• Herzrhythmusstörungen – vital stabil (Vorhofflimmern, ...)</li><li>• Stabile Angina pectoris</li></ul> |
| <b>Atemnot kritisch</b> <ul style="list-style-type: none"><li>• Atemnot bei COPD, Grad 3/4 akute Exazerbation</li><li>• Akuter Asthmaanfall / akute Exazerbation</li><li>• Status asthmaticus</li><li>• Pseudo-Krupp</li><li>• Epiglottitis</li><li>• Akute Laryngitis mit Atemnot bei Kindern</li><li>• Lungenödem/dekompensierte Herzinsuffizienz (vital nicht stabil)</li><li>• Spontanpneumothorax</li><li>• Akute Aspiration / akutes Bolusgeschehen</li><li>• Pleuraerguss mit Beeinträchtigung der Atmung</li></ul>         | <b>Atemnot stabil</b> <ul style="list-style-type: none"><li>• Akute Bronchitis</li><li>• Akute Laryngitis ohne Atemnot</li><li>• Pneumonie</li><li>• Oberer Atemwegsinfekt</li><li>• Hyperventilation</li></ul> <p>+ zusätzlich erfolgreiche<br/>Combivent-Anwendung bei<br/>COPD / Asthma durch NFS</p>        |

---

**Verletzung kritisch**

- Polytrauma
- Offene Bauchverletzung
- Offene Brustkorbverletzung
- Pneumothorax (traumatisch bedingt)
- Starke verletzungsbedingte Schmerzen
- Wirbelsäulenverletzungen mit neurolog. Ausfällen
- Amputationen / Teilamputationen
- Großflächige Verbrennungen
- Innere Blutungen (Milzruptur, Leberruptur, Verletzung von Gefäßen, ...)

**Verletzung stabil**

- Frakturen der Extremitäten ohne starke Schmerzen
- Diverse Riss-Quetsch-Wunden (RQW)
- Diverse Prellungen / Verstauchungen
- Luxationen ohne starke Schmerzen
- Blutungen ohne Schocksymptomatik
- Kleinflächige Verbrennungen bzw. Verbrennungen Grad I
- Komplikationen durch Endoprothesen

---

**Schädelhirntrauma kritisch**

- SHT Grad 2 und 3
- Subdural Hämatom traumatisch
- Epidural Hämatom traumatisch
- Cerebrale Kontusionsblutung

**Kopfverletzungen stabil**

- Commotio cerebri
- Oberflächliche Kopfverletzungen wie Riss-Quetsch-Wunden o.ä.
- Schädelbasisbruch (ohne kritische Begleitverletzungen)

---

**Geburtshilfliche Notfälle**

- Hausgeburt / Geburt im RTW
- Baby bereits sichtbar bzw. Wehenabstand < 2 Min.
- Presswehen
- Risikoschwangerschaft

**Geburtshilfliche Notfälle**

- Wehenabstand > 2 Minuten
- Keine Risikoschwangerschaft
- Nur Fruchtwasserabgang ohne Wehentätigkeit

---

**Geburtshilfliche Notfälle NEF-pflichtig**

- Hausgeburt / Geburt im RTW
- Baby bereits sichtbar bzw. Wehenabstand < 2 Minuten
- Presswehen
- Risikoschwangerschaft

**Geburtshilfliche Notfälle ohne NA**

- Wehenabstand > 2 Minuten
- Keine Risikoschwangerschaft
- Nur Fruchtwasserabgang ohne Wehentätigkeit

---

**Krampfanfall kritisch**

- Status epilepticus
- Andauernde bzw. rezidivierende Fieberkrämpfe
- Krampfanfall mit Bewusstseinsstörungen
- Grand-mal Anfall

**Krampfanfall stabil**

- Z.n. Krampfanfall, vital stabil
  - Psychogene Krampfanfälle
  - Patient wach/orientiert bei Eintreffen RD
-

---

**Apoplex kritisch**

- Apoplex mit Bewusstseinsstörung
- Hämorrhagischer Insult mit Bewusstseinsstörung

**Apoplex stabil**

- TIA (transitorische ischämische Attacke)
  - Apoplex
- 

**Anaphylaxie kritisch**

- Anaphylaktischer Schock

**Anaphylaxie stabil**

- Anaphylaxie stabil (z.B. nur Rötung bzw. Quaddeln ohne Atembeschwerden)
  - Medikamentenreaktionen wie Steven-Johnson-Syndrom
- 

**Bewusstseinsstörungen kritisch**

- soporöse Patienten
- Bewusstlosigkeit

**Bewusstseinsstörungen stabil**

- Somnolente Patienten
  - Synkope
- 

**Intoxikationen kritisch**

- Opiat / Benzodiazepine mit Bewusstseinsstörung
- Andere Intoxikationen mit Bewusstseinsstörung

**Intoxikationen stabil**

- Intoxikationen mit Alkohol (Patient ansprechbar)
  - Andere Intoxikationen ohne Bewusstseinsstörung
- 

**Sonstiges kritisch**

- Tumorkomplikationen vital nicht stabil
- Ertrinkungsnotfälle
- Schocksymptomatik (jegliche Ursache) wenn Vitalwerte schockentsprechend
- OP-Komplikationen mit hohem Blutverlust / Schocksymptomatik
- Hypoglykämie
- Starke Schmerzen bzw. Koliken (Patient ohne Schmerztherapie nicht transportfähig)
- drohender Suizid
- Meningitis / Encephalitis mit Bewusstseinsstörung
- Stromunfälle / Blitzschlag

**Sonstiges stabil**

- Tumorkomplikationen / tumorbedingte Symptomatik vital stabil
  - Gastroenteritis (Übelkeit/Erbrechen)
  - Reflux
  - Fieberhafter Infekt
  - Schwindel – div. Ursachen
  - Hyperglykämie
  - Psychiatrische Erkrankungen (exkl. drohender Suizid)
  - Unwohlsein / Ermüdung
  - Div. Schmerzsymptomatik (Pat. transportfähig)
  - Div. Infektionen (z.B. Harnwegsinfekt, Wundinfektionen, ...)
  - Gynäkologische Notfälle (ohne Schwangerschaft)
  - Nierensteine (wenn keine Schmerztherapie nötig)
  - Niereninsuffizienz
  - Chronische Pankreatitis
  - Leberzirrhose
  - Magenulcus
  - Exsikkose (vital stabil)
  - Migräne
  - Akutes Abdomen
  - Verschiedene Elektrolytentgleisungen
  - OP-Komplikationen vital stabil
  - Fremdkörper in Ösophagus (ohne Atemnot)
  - Div. zahnärztliche Notfälle
    - Prinzipiell gerechtfertigt, wenn Vitalwerte und Patientenzustand stabil
-
